# Supplementary material for: Plectranthus Species with Anti-Inflammatory and Analgesic Potential: A Systematic Review on Ethnobotanical and Pharmacological Findings
Source: MDPI journal article supplement (doi:10.3390/molecules28155653), 2023-07-26
Supplement: s1 [file s1]

## Supplementary data

# *Plectranthus* Species with Anti-Inflammatory and Analgesic Potential: A Systematic Review on Ethnobotanical and Pharmacological Findings

Maysa de Oliveira Barbosa <sup>1,†</sup>, Polrat Wilairatana <sup>2,\*†</sup>, Giovana Mendes de Lacerda Leite <sup>1</sup>, Gyllyandeson de Araújo Delmondes <sup>3</sup>, Lucas Yure Santos da Silva <sup>1</sup>, Silvio Caetano Alves Júnior <sup>4</sup>, Lindaiane Bezerra Rodrigues Dantas <sup>1</sup>, Daniel Souza Bezerra <sup>1</sup>, Izabel Cristina Santiago Lemos de Beltrão <sup>1</sup>, Diógenes de Queiroz Dias <sup>1</sup>, Jaime Ribeiro-Filho <sup>4</sup>, Cícero Francisco Bezerra Felipe <sup>5</sup>, Henrique Douglas Melo Coutinho <sup>1</sup>, Irwin Rose Alencar de Menezes <sup>1,\*†</sup> and Marta Regina Kerntopf Mendonça <sup>1</sup>

- <sup>1</sup> Department of Biological Chemistry, Regional University of Cariri-URCA, Crato 63105-000, CE, Brazil; maysabarbosa.ce@gmail.com (M.d.O.B.); giovanalacerda\_@hotmail.com (G.M.d.L.L.); lucas.yure@urca.br (L.Y.S.d.S.); lindaianebrd@gmail.com (L.B.R.D.); danielbezerra02@gmail.com (D.S.B.); izabel.lemos@urca.br (I.C.S.L.d.B.); diogenes@gmail.com (D.d.Q.D.); hdmcoutinho@gmail.com (H.D.M.C.); martaluiz@yahoo.com.br (M.R.K.M.)
- <sup>2</sup> Department of Clinical Tropical Medicine, Faculty of Tropical Medicine, Mahidol University, Bangkok 10400, Thailand
- <sup>3</sup> Collegiate of Nursing, Federal University of Vale do São Francisco (UNIVASF), Petrolina 56304-917, PE, Brazil; gyllyandeson.delmondes@univasf.edu.br
- <sup>4</sup> Oswaldo Cruz Foundation (FIOCRUZ), Fiocruz Ceará, Eusébio 61773-270, CE, Brazil; silvio.alves.bio@gmail.com (S.C.A.J.); jaime.ribeiro@fiocruz.br (J.R.-F.)
- <sup>5</sup> Department of Molecular Biology, Federal University of Paraíba, João Pessoa 58051-900, PB, Brazil; cicero@dbm.ufpb.br
- \* Correspondence: polrat.wil@mahidol.ac.th (P.W.); irwin.alencar@urca.br (I.R.A.d.M.); Tel.: +55-88-31021291 (I.R.A.d.M.)
- † These authors contributed equally to this work.

**Table S1.** Outline of the descriptor applications and their combinations to databases.

| <i>Plectranthus</i> AND PAIN/NOCICEPTION       |                                                                                                                                                                                                     |               |                                                                  |                                                   |
|------------------------------------------------|-----------------------------------------------------------------------------------------------------------------------------------------------------------------------------------------------------|---------------|------------------------------------------------------------------|---------------------------------------------------|
| Combination                                    | Translation of the search                                                                                                                                                                           |               |                                                                  |                                                   |
|                                                | PubMed                                                                                                                                                                                              | ScienceDirect | Scopus                                                           | Web of Science                                    |
| <i>Plectranthus</i> and analgesic effect       | ("Plectranthus"[MeSH Terms] OR "Plectranthus"[All Fields]) AND ("Analgesics"[All Fields] OR "Analgesics"[MeSH Terms] OR "Analgesics"[All Fields] OR "Analgesic"[All Fields]) AND Effect[All Fields] | NR            | (TITLE-ABS KEY( <i>Plectranthus</i> AND Analgesic effect))       | ( <i>Plectranthus</i> AND Analgesic effect)       |
| <i>Plectranthus</i> and antinociceptive effect | ("Plectranthus"[MeSH Terms] OR "Plectranthus"[All Fields]) AND Antinociceptive[All Fields] AND Effect[All Fields]                                                                                   | NR            | (TITLE-ABS-KEY( <i>Plectranthus</i> AND Antinociceptive effect)) | ( <i>Plectranthus</i> AND Antinociceptive effect) |
| <i>Plectranthus</i> and nociception            | ("Plectranthus"[MeSH Terms] OR "Plectranthus"[All Fields]) AND ("Nociception"[MeSH Terms] OR "Nociception"[All Fields])                                                                             | NR            | (TITLE-ABS-KEY( <i>Plectranthus</i> AND Nociception))            | ( <i>Plectranthus</i> AND Nociception)            |

| <i>Plectranthus</i> and pain                                    | ("Plectranthus"[MeSH Terms] OR "Plectranthus"[All Fields]) AND ("Pain"[MeSH Terms] OR "Pain"[All Fields])                                                                                                                                                                                                                                                                 | NR            | (TITLE-ABS-KEY( <i>Plectranthus</i> AND Pain))                                  | ( <i>Plectranthus</i> AND Pain)                       |
|-----------------------------------------------------------------|---------------------------------------------------------------------------------------------------------------------------------------------------------------------------------------------------------------------------------------------------------------------------------------------------------------------------------------------------------------------------|---------------|---------------------------------------------------------------------------------|-------------------------------------------------------|
| <i>Plectranthus</i> and pain and ethnopharmacology              | ("Plectranthus"[MeSH Terms] OR "Plectranthus"[All Fields]) AND ("Pain"[MeSH Terms] OR "Pain"[All Fields]) AND ("Ethnopharmacology"[MeSH Terms] OR "Ethnopharmacology"[All Fields])                                                                                                                                                                                        | NR            | (TITLE-ABS-KEY( <i>Plectranthus</i> AND Pain AND Ethnopharmacology))            | ( <i>Plectranthus</i> AND Pain AND Ethnopharmacology) |
| <i>Plectranthus</i> and pain and ethnobotanical                 | ("Plectranthus"[MeSH Terms] OR "Plectranthus"[All Fields]) AND ("Pain"[MeSH Terms] OR "Pain"[All Fields]) AND Ethnobotanical[All Fields]                                                                                                                                                                                                                                  | NR            | Not Applicable                                                                  | Not Applicable                                        |
| <i>Plectranthus</i> and pain and medicinal use                  | ("Plectranthus"[MeSH Terms] OR "Plectranthus"[All Fields]) AND ("Pain"[MeSH Terms] OR "Pain"[All Fields]) AND Medicinal[All Fields]                                                                                                                                                                                                                                       | NR            | (TITLE-ABS-KEY( <i>Plectranthus</i> AND Pain AND Medicinal use))                | ( <i>Plectranthus</i> AND Pain AND Medicinal use)     |
| <b><i>Plectranthus</i> AND INFLAMMATION</b>                     |                                                                                                                                                                                                                                                                                                                                                                           |               |                                                                                 |                                                       |
| Combination                                                     | Translation of the search                                                                                                                                                                                                                                                                                                                                                 |               |                                                                                 |                                                       |
|                                                                 | PubMed                                                                                                                                                                                                                                                                                                                                                                    | ScienceDirect | Scopus                                                                          | Web of Science                                        |
| <i>Plectranthus</i> and anti-inflammatory effect                | ("Plectranthus"[MeSH Terms] OR "Plectranthus"[All Fields]) AND ("Anti-inflammatory agents"[All Fields] OR "Anti-inflammatory agents"[MeSH Terms] OR ("Anti-inflammatory"[All Fields] AND "Agents"[All Fields]) OR "Anti-inflammatory agents"[All Fields] OR ("Anti"[All Fields] AND "Inflammatory"[All Fields]) OR "Antiinflammatory"[All Fields]) AND Effect[All Fields] | NR            | TITLE-ABS-KEY( <i>Plectranthus</i> AND Anti-inflammatory effect)                | ( <i>Plectranthus</i> AND Anti-inflammatory effect)   |
| <i>Plectranthus</i> and anti-inflammatory                       | ("Plectranthus"[MeSH Terms] OR "Plectranthus"[All Fields]) AND ("Anti-inflammatory agents"[All Fields] OR "Anti-inflammatory agents"[MeSH Terms] OR ("Anti-inflammatory"[All Fields] AND "Agents"[All Fields]) OR "Anti-inflammatory agents"[All Fields] OR ("Anti"[All Fields] AND "Inflammatory"[All Fields]) OR "Antiinflammatory"[All Fields])                        | NR            | TITLE-ABS-KEY( <i>Plectranthus</i> AND Anti-inflammatory)                       | <i>Plectranthus</i> AND Anti-inflammatory)            |
| <i>Plectranthus</i> and anti-inflammatory and ethnopharmacology | ("Plectranthus"[MeSH Terms] OR "Plectranthus"[All Fields]) AND ("Anti-inflammatory agents"[All Fields] OR "Anti-inflammatory agents"[MeSH Terms] OR ("Anti-inflammatory"[All Fields] AND                                                                                                                                                                                  | NR            | TITLE-ABS-KEY( <i>Plectranthus</i> AND Anti-inflammatory AND Ethnopharmacology) | Not Applicable                                        |

|                                                            |                                                                                                                                                                                                                                          |    |                                                                            |                                                           |
|------------------------------------------------------------|------------------------------------------------------------------------------------------------------------------------------------------------------------------------------------------------------------------------------------------|----|----------------------------------------------------------------------------|-----------------------------------------------------------|
|                                                            | "Agents"[All Fields]) OR "Anti-inflammatory agents"[All Fields]<br>OR ("Anti"[All Fields] AND "Inflammatory"[All Fields]) OR "Antiinflammatory"[All Fields])<br>AND ("Ethnopharmacology"[MeSH Terms] OR "Ethnopharmacology"[All Fields]) |    |                                                                            |                                                           |
| <i>Plectranthus</i> and inflammatory                       | ("Plectranthus"[MeSH Terms] OR "Plectranthus"[All Fields]) AND "Inflammatory" [All Fields]                                                                                                                                               | NR | TITLE-ABS-KEY( <i>Plectranthus</i> AND Inflammatory)                       | ( <i>Plectranthus</i> AND Inflammatory)                   |
| <i>Plectranthus</i> and inflammatory and ethnopharmacology | ("Plectranthus"[MeSH Terms] OR "Plectranthus"[All Fields]) AND "Inflammatory" [All Fields] AND ("Ethnopharmacology"[MeSH Terms] OR "Ethnopharmacology"[All Fields])                                                                      | NR | TITLE-ABS-KEY( <i>Plectranthus</i> AND Inflammatory AND Ethnopharmacology) | Not Applicable                                            |
| <i>Plectranthus</i> and inflammatory and ethnobotanical    | ("Plectranthus"[MeSH Terms] OR "Plectranthus"[All Fields]) AND "Inflammatory" [All Fields] AND Etnobotanical[All Fields]                                                                                                                 | NR | Not Applicable                                                             | Not Applicable                                            |
| <i>Plectranthus</i> and inflammatory and medicinal use     | ("Plectranthus"[MeSH Terms] OR "Plectranthus"[All Fields]) AND "Inflammatory" [All Fields] AND "Medicinal" [All Fields]                                                                                                                  | NR | TITLE-ABS-KEY( <i>Plectranthus</i> AND Inflammatory AND Medicinal use)     | ( <i>Plectranthus</i> AND Inflammatory AND Medicinal use) |

NR= not reported.

**Table S2.** Description of initial and final results by accessed database.

| <i>Plectranthus</i> and inflammation                            |           |                  |                |                   |                  |                   |                |                  |
|-----------------------------------------------------------------|-----------|------------------|----------------|-------------------|------------------|-------------------|----------------|------------------|
| Descriptors Combination                                         | PubMed    |                  | Science Direct |                   | Scopus           |                   | Web of Science |                  |
|                                                                 | IR        | FR               | IR             | FR                | IR               | FR                | IR             | FR               |
| <i>Plectranthus</i> and anti-inflammatory effect                | 205       | 9                | 240            | 73                | 34               | 14                | 14             | 4                |
| <i>Plectranthus</i> and anti-inflammatory                       | 229       | 14               | 387            | 184               | 49               | 19                | 20             | 5                |
| <i>Plectranthus</i> and anti-inflammatory and ethnopharmacology | 29        | 2                | 111            | 41                | 7                | 4                 | 0              | 0                |
| <i>Plectranthus</i> and inflammatory                            | 234       | 12               | 212            | 8                 | 70               | 29                | 27             | 7                |
| <i>Plectranthus</i> and inflammatory and ethnopharmacology      | 29        | 1                | 113            | 42                | 5                | 4                 | 0              | 0                |
| <i>Plectranthus</i> and inflammatory and etnobotanical          | 2         | 2                | 0              | 0                 | 2                | 1                 | 0              | 0                |
| <i>Plectranthus</i> and inflammatory and medicinal use          | 185       | 10               | 336            | 166               | 41               | 25                | 18             | 6                |
| Total by data bases                                             | 913       | $\frac{50}{8^*}$ | 1399           | $\frac{514}{9^*}$ | 208              | $\frac{96}{21^*}$ | 79             | $\frac{22}{7^*}$ |
| Total                                                           | IR= 2.599 |                  |                |                   | PR= 682; FR= 45* |                   |                |                  |
| <i>Plectranthus</i> and pain/nociception                        |           |                  |                |                   |                  |                   |                |                  |
| Descriptors Combination                                         | PubMed    |                  | Science Direct |                   | Scopus           |                   | Web of Science |                  |
|                                                                 | IR        | FR               | IR             | FR                | IR               | FR                | IR             | FR               |
| <i>Plectranthus</i> and analgesic effect                        | 78        | 9                | 154            | 75                | 8                | 4                 | 5              | 1                |
| <i>Plectranthus</i> and antinociceptive effect                  | 41        | 3                | 56             | 27                | 2                | 1                 | 1              | 0                |
| <i>Plectranthus</i> and nociception                             | 12        | 2                | 11             | 7                 | 19               | 18                | 1              | 1                |

|                                                    |                  |                                     |            |                                      |            |                                      |           |                                   |
|----------------------------------------------------|------------------|-------------------------------------|------------|--------------------------------------|------------|--------------------------------------|-----------|-----------------------------------|
| <i>Plectranthus</i> and pain                       | 120              | 9                                   | 278        | 125                                  | 206        | 197                                  | 3         | 2                                 |
| <i>Plectranthus</i> and pain and ethnopharmacology | 31               | 4                                   | 136        | 48                                   | 147        | 135                                  | 1         | 1                                 |
| <i>Plectranthus</i> and pain and ethnobotanical    | 77               | 8                                   | 55         | 52                                   | 57         | 50                                   | 0         | 0                                 |
| <i>Plectranthus</i> and pain and medicinal use     | 105              | 8                                   | 256        | 109                                  | 188        | 167                                  | 1         | 1                                 |
| <b>Total by data base</b>                          | <b>464</b>       | <b><math>\frac{43}{10^*}</math></b> | <b>946</b> | <b><math>\frac{443}{13^*}</math></b> | <b>627</b> | <b><math>\frac{472}{10^*}</math></b> | <b>12</b> | <b><math>\frac{6}{2^*}</math></b> |
| <b>Total</b>                                       | <b>IR= 2.049</b> |                                     |            | <b>PR= 964; FR= 35*</b>              |            |                                      |           |                                   |

IR= Initial Results. PR= Partial Result (after inclusion and exclusion criteria).FR= Final Result (selected after exclusion of duplicated articles).

| Species                                        |                                                                                      |  |
|------------------------------------------------|--------------------------------------------------------------------------------------|--|
| <i>Plectranthus amboinicus</i> (Lour.) Spreng. |    |  |
| <i>Plectranthus barbatus</i> (Andrews) Benth.  |   |  |
| <i>Plectranthus neochilus</i> Schtr.           |  |  |

| Species                                  |                                                                                                                                                                                                                                                                                                  |
|------------------------------------------|--------------------------------------------------------------------------------------------------------------------------------------------------------------------------------------------------------------------------------------------------------------------------------------------------|
| <i>Plectranthus coleoides</i> Benth.     |  A close-up photograph of a Plectranthus coleoides plant. The leaves are green with prominent white variegation along the edges. Small, light purple flowers are visible on a stem extending from the foliage. |
| <i>Plectranthus kilimandschari</i> Gurke |  A close-up photograph of a Plectranthus kilimandschari plant. The leaves are a vibrant, solid orange-red color with a distinctively textured, almost wrinkled surface.                                       |
| <i>Plectranthus lanuginosus</i>          |  A close-up photograph of a Plectranthus lanuginosus plant. The leaves are bright green, ovate, and have a very fuzzy, lanuginous texture. The edges of the leaves are slightly wavy.                        |
| <i>Plectranthus ornatus</i> Codd.        |  A photograph of a Plectranthus ornatus plant. It shows a dense, low-growing bush of green leaves. A tall, upright stem with small, light purple flowers is visible on the left side of the frame.           |



| Species                                         |                                                                                      |
|-------------------------------------------------|--------------------------------------------------------------------------------------|
| <i>Plectranthus rugosus</i>                     |    |
| <i>Plectranthus scutellarioides</i> (L.) R. Br. |   |
| <i>Plectranthus zeylanicus</i> Benth.           |  |
